# Supplementary material for: Fatty Acid Spectra in Mesopelagic Fishes of the Myctophidae and Stomiidae Families Collected in the North East Atlantic
Source: MDPI journal article supplement (doi:10.3390/d15020166), 2023-01-25
Supplement: s1 [file s1]

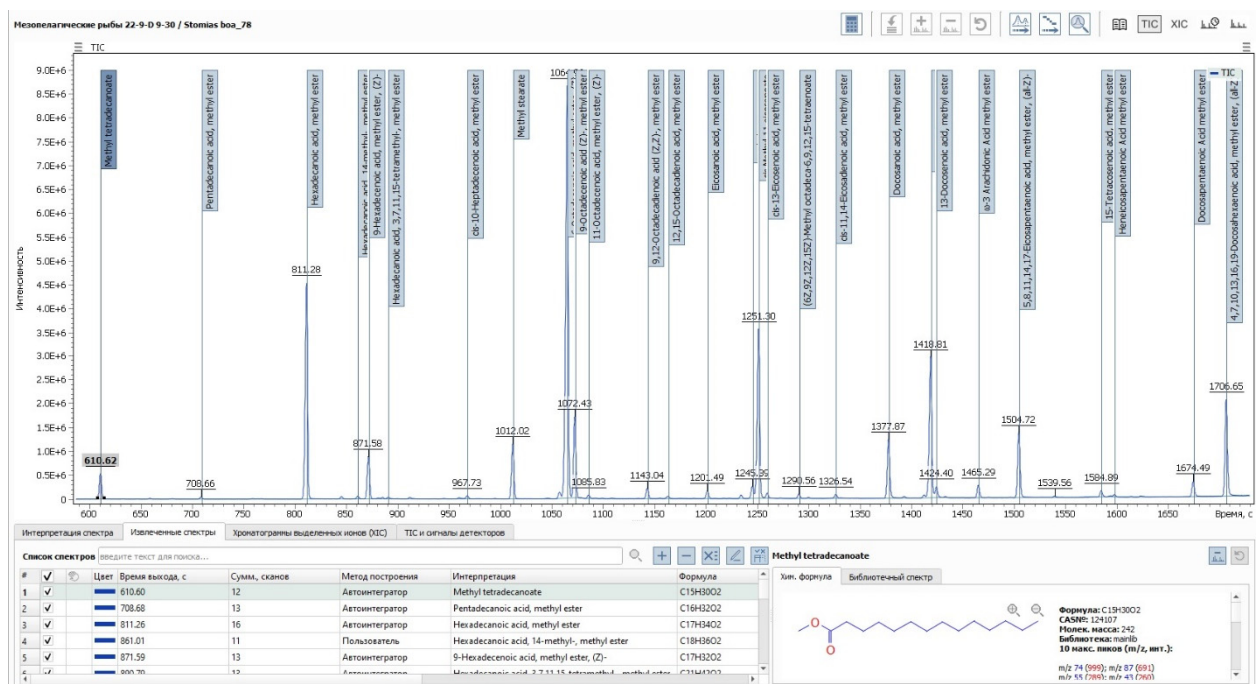

Figure S1: An example of a chromatogram and the identified FAs of the muscle tissue of *Stomias boa* using the gas chromatography method with mass-selective detection (GC-MS).
