# Supplementary material for: Fatty Acid Spectra in Mesopelagic Fishes of the Myctophidae and Stomiidae Families Collected in the North East Atlantic
Source: MDPI journal article supplement (doi:10.3390/d15020166), 2023-01-25
Supplement: s1 [file s1]

Archive with 1 entries (1 files):
- diversity-2134403-supplementary.pdf
